# Supplementary material
Source: publisher figshare collection journal article supplement (https://gsapubs.figshare.com/ndownloader/files/28496568)
Supplement: Supplementary file 1 [file 28496568]

## Sheet: Sheet2
First heating		First cooling		Second heating		Second cooling
T (°C)	Magnetic moment (MS/Mo)	T (°C)	Magnetic moment (MS/Mo)	T (°C)	Magnetic moment (MS/Mo)	T (°C)	Magnetic moment (MS/Mo)
21	1	626	0.0167139	22	1.64933	619	0.0088146
21	1.05149	631	-0.00583992	22	1.66188	623	0.00732229
21	1.04925	633	0.0136298	22	1.6579	628	0.0095906
21	1.04859	634	0.0149231	22	1.65692	631	0.0134308
21	1.05196	632	0.0198975	22	1.64254	633	0.0160175
21	1.04151	629	0.0135303	22	1.65279	632	0.0190021
21	1.04674	625	0.0140277	22	1.65926	630	0.0103467
21	1.04809	621	0.0353181	22	1.6595	627	0.0140277
22	1.05154	618	0.0127344	23	1.67924	623	0.0155201
22	1.05201	616	-0.00618813	23	1.68065	618	0.0188032
23	1.05144	617	0.00550166	24	1.69895	615	0.0150226
24	1.04476	620	-0.0133313	25	1.68485	614	0.00660598
25	1.04508	623	-0.00181067	26	1.72112	615	0.00876486
26	1.07864	624	-0.0204944	27	1.70617	617	0.00684475
28	1.03122	624	0.0048351	29	1.68705	619	-0.0019798
29	1.04861	623	0.0112421	30	1.69446	620	0.0105457
31	1.04958	620	-0.0087947	32	1.69782	620	0.0051833
33	1.04919	616	0.0113416	33	1.68358	619	0.00887429
34	1.04591	611	-0.0109436	35	1.67239	616	0.0117395
35	1.03073	607	-0.0168134	36	1.66252	612	0.00975973
36	1.05092	604	-0.0113416	37	1.64864	607	0.00715316
38	1.04795	602	-0.0233796	38	1.64518	603	0.0237775
39	1.04441	603	0.0300452	39	1.63065	599	0.015719
40	1.05328	604	0.0176093	40	1.65031	598	0.0104462
40	1.05223	606	0.015918	41	1.63028	598	0.0183057
41	1.04021	607	0.0140277	42	1.66008	599	0.0148236
42	1.04954	606	0.00848629	43	1.64997	600	0.0196985
43	1.049	604	0.0024275	44	1.66644	601	0.0218873
44	1.05054	601	-0.00837685	44	1.67854	600	0.0114411
44	1.05637	597	0.0121375	45	1.69143	598	0.0115406
45	1.05717	592	0.012237	46	1.69667	595	0.0148236
47	1.05847	588	0.00633736	48	1.69854	591	0.0167139
48	1.05284	585	0.0260657	49	1.70746	587	0.0338258
49	1.05717	583	0.00330299	51	1.69453	583	0.0326319
51	1.05492	583	0.0245734	52	1.69209	579	0.0385017
53	1.06909	584	-0.0235786	54	1.67865	577	0.0353181
55	1.05192	585	0.0235786	56	1.66411	577	0.0420832
56	1.06197	586	0.0106452	57	1.65426	577	0.0416853
58	1.058	585	0.0129334	59	1.64201	578	0.040193
59	1.05571	583	0.0200965	60	1.63516	579	0.0387007
60	1.05212	580	0.0172114	61	1.60894	578	0.0405909
61	1.05004	576	0.027757	62	1.6148	577	0.0491469
62	1.04836	572	0.0293488	63	1.60589	574	0.0505397
64	1.04927	568	0.0362135	64	1.63789	570	0.0649654
64	1.05007	564	0.0393971	65	1.63642	566	0.0856588
65	1.0467	562	0.0394966	66	1.64571	562	0.0971994
66	1.04715	562	0.036114	67	1.66063	558	0.11839
67	1.04898	562	0.0323335	68	1.66769	556	0.124359
68	1.06045	563	0.0233796	69	1.67118	555	0.133313
69	1.05408	564	0.0305427	70	1.68458	555	0.123365
71	1.05656	563	0.0223847	72	1.6794	555	0.110431
72	1.05585	562	0.0309406	73	1.67955	556	0.115406
74	1.06423	559	0.0447694	75	1.67029	556	0.119385
76	1.05891	556	0.0598915	77	1.6873	555	0.129334
77	1.05288	552	0.0829726	78	1.6508	553	0.134308
79	1.0698	548	0.0988907	80	1.65428	550	0.154206
80	1.05917	544	0.115406	81	1.62885	546	0.173108
82	1.06053	542	0.127344	83	1.60994	542	0.194001
83	1.06025	540	0.121375	84	1.60913	538	0.205939
84	1.05409	540	0.129334	85	1.59107	535	0.234791
85	1.05235	541	0.134308	86	1.6109	533	0.230811
86	1.04688	541	0.134308	87	1.59212	532	0.255683
87	1.05042	541	0.136298	88	1.60621	532	0.237775
88	1.05604	540	0.146247	89	1.61273	533	0.245734
89	1.05474	539	0.156195	89	1.63107	533	0.251704
90	1.05166	536	0.174103	91	1.64118	532	0.257673
91	1.04835	533	0.19798	92	1.64053	531	0.263642
92	1.06918	529	0.20395	93	1.65584	529	0.286524
94	1.05948	525	0.223847	95	1.64762	526	0.296473
96	1.06069	521	0.23877	97	1.65107	522	0.336268
97	1.05354	519	0.246729	98	1.65196	518	0.368104
99	1.06633	518	0.258668	100	1.65407	515	0.385017
101	1.07075	518	0.260657	102	1.62344	512	0.416853
102	1.07388	518	0.252698	103	1.61909	510	0.425807
104	1.05492	518	0.23678	105	1.60466	509	0.439735
105	1.0745	518	0.267622	106	1.61622	509	0.445704
106	1.06684	517	0.266627	107	1.59772	509	0.43874
107	1.06417	516	0.262647	108	1.59763	509	0.44272
108	1.05463	513	0.269611	108	1.59545	509	0.452668
108	1.06223	510	0.307417	109	1.58888	508	0.463612
109	1.05892	506	0.332289	110	1.59479	506	0.47953
110	1.05708	503	0.355171	111	1.60233	503	0.504402
111	1.06598	499	0.373078	112	1.61028	500	0.536238
112	1.05719	497	0.373078	113	1.61846	496	0.560115
114	1.06689	495	0.388996	115	1.61476	493	0.596925
116	1.05791	495	0.382032	117	1.6236	490	0.623787
117	1.05854	495	0.388996	118	1.62264	487	0.63871
119	1.05971	495	0.395961	120	1.6269	486	0.645674
121	1.05275	495	0.394966	122	1.62819	486	0.667562
122	1.05732	494	0.402925	124	1.61448	486	0.667562
124	1.04486	493	0.426802	125	1.61523	486	0.657613
125	1.05777	491	0.431776	126	1.60355	485	0.674526
126	1.06274	488	0.443715	127	1.5863	485	0.680495
127	1.05539	485	0.467592	128	1.57003	483	0.689449
128	1.06438	481	0.495448	129	1.57784	481	0.711336
129	1.06402	478	0.514351	130	1.57224	478	0.72228
129	1.0536	475	0.548177	130	1.57502	475	0.770034
130	1.06192	473	0.55713	131	1.57857	471	0.796895
131	1.06765	472	0.554146	132	1.57126	468	0.818783
132	1.05401	472	0.56111	133	1.58394	465	0.831716
134	1.072	472	0.582002	135	1.59108	463	0.847634
135	1.06705	472	0.578023	137	1.59207	462	0.855593
137	1.06221	471	0.572054	138	1.59747	462	0.84266
139	1.06696	470	0.587972	140	1.60819	462	0.855593
141	1.06449	469	0.617818	142	1.60248	462	0.865542
143	1.05744	466	0.626772	144	1.6117	461	0.867532
144	1.06923	464	0.630751	145	1.59493	460	0.871511
146	1.05926	460	0.663582	146	1.60192	458	0.88345
147	1.06229	457	0.678505	148	1.58543	456	0.906332
148	1.06622	454	0.684475	148	1.58279	454	0.911306
148	1.06272	451	0.712331	149	1.57054	451	0.931204
149	1.05952	449	0.733223	150	1.56933	447	0.949111
150	1.06331	448	0.733223	150	1.56378	444	0.95707
150	1.06053	448	0.719295	151	1.55365	442	0.980948
151	1.06732	448	0.754116	152	1.5461	440	0.985922
152	1.06411	448	0.758095	153	1.5521	438	0.995371
154	1.06081	447	0.758095	155	1.5552	438	1.0062
155	1.06216	446	0.768044	157	1.56029	437	0.997219
157	1.05105	444	0.786947	158	1.56882	437	1.00516
159	1.05771	442	0.792916	160	1.56948	437	1.003
161	1.05736	440	0.795901	162	1.57219	436	1.01327
163	1.05962	437	0.814803	164	1.58009	434	1.02638
164	1.05946	434	0.845644	165	1.59093	432	1.02198
166	1.06505	431	0.860568	167	1.58758	430	1.0367
167	1.0666	428	0.868527	168	1.58242	427	1.05387
168	1.07057	426	0.876486	169	1.58041	424	1.05754
169	1.05699	424	0.896383	169	1.57742	421	1.07425
169	1.05656	424	0.895388	170	1.57433	418	1.07812
170	1.06361	423	0.892404	170	1.55824	416	1.08111
170	1.05662	423	0.905337	171	1.54787	414	1.09463
171	1.06418	423	0.925234	172	1.53971	413	1.10475
172	1.07111	422	0.938168	173	1.5327	413	1.10293
174	1.04447	420	0.938168	175	1.52651	412	1.10371
175	1.0587	419	0.946127	177	1.528	412	1.11494
177	1.0545	416	0.953091	179	1.52908	411	1.11591
179	1.05938	414	0.971994	181	1.52953	410	1.12165
181	1.0557	411	0.982937	182	1.52221	408	1.12718
183	1.05497	408	1.00952	184	1.54428	406	1.13178
185	1.05316	405	1.03208	186	1.54113	404	1.13579
186	1.06063	403	1.04111	187	1.55208	401	1.14894
187	1.06157	401	1.04568	188	1.55572	399	1.16027
188	1.06343	399	1.04952	189	1.56559	396	1.17147
189	1.05673	398	1.04955	189	1.56805	393	1.17324
189	1.0573	398	1.06078	190	1.56054	391	1.17439
190	1.05492	398	1.07264	190	1.56382	389	1.17907
190	1.07141	397	1.08122	191	1.54764	388	1.19666
191	1.06029	396	1.10016	192	1.54724	387	1.20056
192	1.04946	395	1.10376	193	1.53897	387	1.18935
194	1.05081	393	1.10362	195	1.52943	386	1.20322
195	1.05326	391	1.11048	197	1.51817	385	1.20916
197	1.0684	389	1.11803	199	1.50549	384	1.20887
200	1.0613	386	1.13393	201	1.50593	383	1.21612
202	1.05156	383	1.14303	203	1.49473	381	1.21587
203	1.05308	380	1.15353	204	1.50211	379	1.22546
205	1.05783	378	1.18743	206	1.49913	376	1.22677
206	1.04835	376	1.1916	207	1.51609	374	1.23872
207	1.05597	374	1.19731	208	1.51555	371	1.24259
208	1.05159	373	1.19488	209	1.51763	368	1.25564
208	1.05995	372	1.19869	209	1.52618	366	1.25687
209	1.05725	372	1.20123	209	1.53159	364	1.26803
209	1.05344	371	1.20572	210	1.53579	362	1.27592
210	1.05549	370	1.2137	211	1.53255	361	1.26713
211	1.06166	369	1.21581	212	1.53281	361	1.27489
212	1.05745	367	1.23015	213	1.53105	360	1.27189
214	1.05973	365	1.24729	215	1.50741	359	1.27828
216	1.06598	363	1.24829	217	1.50594	358	1.27754
218	1.05977	361	1.26057	219	1.50395	357	1.28237
220	1.05064	359	1.2777	221	1.48634	355	1.28272
222	1.05528	356	1.2879	223	1.48345	353	1.30063
224	1.05793	353	1.27795	225	1.48686	351	1.30318
225	1.05154	351	1.29665	226	1.4842	349	1.30843
226	1.05875	349	1.30401	227	1.48244	346	1.31615
227	1.04709	347	1.31038	228	1.47487	344	1.3147
228	1.04408	346	1.3159	228	1.48999	341	1.32936
228	1.05175	345	1.32252	229	1.49309	339	1.32927
228	1.04338	344	1.32578	229	1.49177	337	1.32723
229	1.05475	344	1.33146	229	1.49654	336	1.3407
229	1.04583	343	1.3361	230	1.50224	334	1.34335
231	1.05736	341	1.33941	232	1.49438	333	1.33274
232	1.01438	340	1.3445	233	1.49997	333	1.34693
234	1.06265	338	1.35426	235	1.4933	332	1.34125
236	1.04305	336	1.35521	238	1.49947	331	1.3404
239	1.05537	334	1.38112	240	1.46641	329	1.33898
241	1.0663	332	1.3719	242	1.45466	328	1.35374
243	1.039	329	1.3846	244	1.4716	326	1.36528
244	1.06128	327	1.40264	245	1.46468	324	1.37145
245	1.04096	325	1.42011	246	1.45674	322	1.36258
246	1.05988	322	1.41402	247	1.4525	320	1.3707
247	1.03209	321	1.43636	247	1.45255	318	1.36777
247	1.05108	319	1.43834	248	1.45227	315	1.38828
247	1.04921	318	1.43056	248	1.45564	313	1.38101
247	1.05208	317	1.44929	248	1.45991	311	1.39589
248	1.04476	316	1.45481	249	1.45864	309	1.39016
249	1.0471	315	1.45634	250	1.47194	307	1.39691
251	1.05752	314	1.45466	252	1.47446	306	1.39504
253	1.05582	312	1.46258	254	1.47295	305	1.3907
255	1.0469	311	1.46428	256	1.45578	304	1.39505
258	1.03941	309	1.46562	258	1.4652	303	1.38729
260	1.04348	307	1.46708	261	1.45055	302	1.3981
262	1.04743	305	1.46592	262	1.44327	300	1.39852
263	1.04172	303	1.47908	264	1.4474	299	1.41336
264	1.04214	301	1.48107	265	1.43881	297	1.4076
265	1.04792	298	1.49771	266	1.43625	295	1.41615
265	1.03595	296	1.49713	266	1.41576	293	1.40424
266	1.04351	294	1.50098	266	1.4207	291	1.4277
266	1.0383	292	1.51186	267	1.42397	289	1.41743
266	1.03678	291	1.51391	267	1.42143	287	1.42042
266	1.04537	289	1.51282	267	1.41556	285	1.43243
268	1.04854	288	1.51867	269	1.41352	283	1.43624
269	1.03798	287	1.51046	270	1.4318	281	1.43209
271	1.03722	286	1.50771	272	1.41895	279	1.4394
274	1.01161	285	1.53279	275	1.41823	277	1.45267
276	1.04156	283	1.52421	277	1.4254	276	1.44689
279	1.02931	282	1.52817	279	1.42642	275	1.448
281	1.02888	280	1.53562	281	1.43017	273	1.44554
282	1.03146	278	1.53496	283	1.41604	272	1.45135
283	1.00953	277	1.5419	284	1.42116	271	1.45827
284	1.02573	275	1.54434	285	1.40308	270	1.46295
284	1.03201	273	1.54112	285	1.41349	268	1.45486
284	1.0332	271	1.54453	285	1.40575	266	1.45357
284	1.02531	268	1.54241	285	1.39544	265	1.45399
284	1.02909	266	1.55315	285	1.38697	263	1.47081
285	1.02357	264	1.55412	286	1.39132	261	1.46515
286	1.03706	262	1.55359	287	1.38479	259	1.47577
288	1.0298	261	1.56251	289	1.3719	257	1.46488
290	1.01593	259	1.55389	291	1.37722	255	1.46914
293	1.02323	258	1.56192	293	1.37369	253	1.47915
295	1.02342	256	1.57422	296	1.3729	251	1.4867
298	1.01751	255	1.57468	298	1.3677	249	1.49755
299	1.01937	254	1.57069	300	1.37616	247	1.48488
301	1.02189	253	1.57596	302	1.36968	246	1.49604
302	1.02809	251	1.57174	303	1.3711	244	1.48986
302	1.01882	250	1.57049	303	1.37327	243	1.50503
302	1.02367	248	1.58007	304	1.37563	242	1.48719
302	1.02846	246	1.58912	304	1.37859	240	1.49594
302	1.01611	244	1.58792	303	1.37647	239	1.49497
302	1.03108	243	1.58291	304	1.36974	238	1.50321
303	1.02316	241	1.60093	304	1.36532	236	1.50121
305	1.02498	239	1.59791	306	1.3555	234	1.5018
307	1.01957	237	1.59888	307	1.34878	233	1.49813
309	1.01112	235	1.60069	310	1.35401	231	1.51603
312	1.01005	233	1.59629	312	1.3295	229	1.51258
315	0.99789	231	1.61237	315	1.32121	227	1.52245
317	1.0016	229	1.60879	317	1.31695	226	1.52287
319	0.994876	227	1.60911	319	1.29833	224	1.51935
320	1.00127	226	1.61331	321	1.30258	222	1.51963
320	1.0061	224	1.61569	321	1.29141	220	1.53424
321	1.00967	223	1.62075	322	1.3003	218	1.52346
320	1.00058	221	1.62782	322	1.30745	216	1.53686
320	1.02019	220	1.62722	322	1.30466	214	1.53547
320	0.999397	219	1.61824	322	1.32167	212	1.54124
321	1.01488	217	1.62681	322	1.31746	211	1.53999
322	0.99882	216	1.63361	323	1.317	209	1.54932
324	1.00132	214	1.62515	324	1.31167	208	1.54365
326	1.00411	213	1.63167	326	1.29255	206	1.54444
329	0.999911	211	1.63118	329	1.28355	205	1.5437
332	0.996578	209	1.63931	332	1.27348	203	1.55892
334	0.983932	208	1.64699	334	1.25527	202	1.55223
336	0.986917	206	1.63864	337	1.24469	200	1.55793
337	0.983932	204	1.64565	338	1.23709	199	1.54776
338	0.981942	202	1.64508	339	1.23479	197	1.5525
338	0.987912	200	1.64903	340	1.23762	196	1.56309
338	0.979953	199	1.65269	340	1.23733	194	1.55942
338	0.970004	197	1.65205	340	1.23607	192	1.56798
338	0.979953	195	1.64671	339	1.22685	191	1.57489
338	0.985922	193	1.66254	339	1.24059	189	1.57908
339	0.979953	191	1.67164	340	1.24819	187	1.56827
341	0.985922	189	1.65816	341	1.22694	186	1.57047
343	0.970999	187	1.66009	343	1.23289	184	1.56986
346	0.990896	186	1.66497	346	1.22469	182	1.58064
349	0.987912	184	1.67156	349	1.22157	180	1.58195
351	0.967019	182	1.66547	351	1.2152	179	1.58942
354	0.955081	181	1.65461	354	1.20418	177	1.5835
355	0.96304	179	1.6698	356	1.2057	175	1.59637
356	0.958065	178	1.677	357	1.18736	173	1.58877
356	0.962045	176	1.68518	358	1.18004	172	1.60135
356	0.95906	175	1.68017	358	1.18692	170	1.59308
355	0.967019	173	1.68188	357	1.17744	168	1.58616
355	0.96304	172	1.68489	357	1.18681	167	1.6102
355	0.96304	170	1.6792	357	1.18316	165	1.5943
356	0.966024	169	1.69097	357	1.18355	163	1.6014
358	0.953091	167	1.68516	358	1.19117	162	1.59481
361	0.95906	166	1.6947	360	1.17874	160	1.61042
364	0.949111	164	1.69363	363	1.16976	158	1.60329
366	0.945132	163	1.69081	366	1.17407	157	1.61761
369	0.938168	161	1.69355	369	1.15526	155	1.61089
371	0.943142	159	1.69336	371	1.16401	153	1.60977
373	0.936178	158	1.696	373	1.15145	152	1.59957
373	0.944137	156	1.69484	375	1.14526	150	1.62198
373	0.935183	155	1.69348	375	1.13387	148	1.62022
373	0.930209	153	1.69038	375	1.1413	147	1.62191
372	0.945132	152	1.70519	375	1.14117	145	1.61697
372	0.941152	150	1.69974	374	1.14121	144	1.62987
372	0.935183	149	1.70879	374	1.14365	142	1.63118
373	0.935183	147	1.70396	375	1.14031	141	1.62221
375	0.92026	146	1.71474	376	1.13187	139	1.6382
378	0.921255	144	1.71361	378	1.11388	138	1.63124
381	0.914291	143	1.71808	381	1.10958	136	1.62987
385	0.911306	141	1.71435	384	1.1142	135	1.64075
387	0.908322	140	1.70567	387	1.08937	133	1.64363
389	0.906332	138	1.71609	389	1.09	132	1.64326
390	0.887429	137	1.71999	391	1.08407	130	1.63647
390	0.899368	135	1.72575	392	1.09585	129	1.63794
390	0.903347	134	1.7164	392	1.08784	127	1.64028
390	0.903347	132	1.71959	392	1.08641	126	1.64642
389	0.912301	131	1.72553	392	1.11535	125	1.64937
389	0.903347	129	1.72714	391	1.11181	123	1.64968
389	0.921255	128	1.71401	391	1.11786	122	1.64832
391	0.895388	127	1.72289	392	1.10311	120	1.64007
394	0.892404	125	1.72514	393	1.09182	119	1.65326
396	0.882455	124	1.73149	396	1.08471	118	1.65887
400	0.88146	123	1.73564	399	1.07199	117	1.64479
403	0.870516	121	1.73934	402	1.05713	115	1.65318
405	0.873501	120	1.7275	405	1.04467	114	1.64108
407	0.859573	119	1.73685	407	1.03675	113	1.65893
407	0.853603	117	1.74213	409	1.02027	111	1.64915
407	0.865542	116	1.73027	409	1.01871	110	1.66117
407	0.867532	115	1.73713	409	1.02674	109	1.66482
406	0.857583	113	1.7459	409	1.03624	108	1.66446
405	0.882455	112	1.73352	408	1.02564	107	1.66845
406	0.885439	111	1.73649	408	1.04914	105	1.66465
407	0.88345	110	1.74703	408	1.05861	104	1.67039
409	0.863552	109	1.74859	409	1.05748	103	1.67092
412	0.853603	107	1.74304	411	1.04023	102	1.66686
415	0.846639	106	1.74792	414	1.03871	101	1.66053
419	0.837685	105	1.74921	417	1.02237	100	1.67179
421	0.835696	104	1.75267	420	1.01606	99	1.68026
423	0.811819	103	1.74832	423	1.00453	98	1.68277
424	0.843655	102	1.76354	425	0.973983	97	1.67669
424	0.818783	101	1.7398	426	0.983932	96	1.66696
423	0.825747	99	1.76445	426	0.982937	95	1.68026
423	0.833706	98	1.75906	426	0.976968	93	1.67858
422	0.833706	97	1.74538	425	0.975973	93	1.67466
422	0.829726	96	1.74525	424	0.983932	92	1.68337
423	0.815798	95	1.75114	424	0.995375	91	1.69058
425	0.815798	94	1.7533	425	0.992886	90	1.67364
428	0.807839	93	1.76318	427	0.972988	89	1.67992
431	0.798885	92	1.7585	430	0.977963	88	1.67413
434	0.780977	91	1.76384	433	0.95707	87	1.67389
437	0.776998	90	1.75674	436	0.965029	86	1.68755
439	0.771029	89	1.75395	439	0.908322	85	1.69153
440	0.769039	88	1.76328	441	0.934188	84	1.68403
441	0.765059	87	1.77403	442	0.940158	83	1.6871
440	0.774013	86	1.75766	443	0.931204	82	1.69259
439	0.776003	85	1.76319	442	0.929214	81	1.68724
438	0.784957	85	1.76899	441	0.931204	81	1.69385
438	0.784957	84	1.76213	440	0.936178	80	1.68637
439	0.776003	83	1.75879	440	0.941152	79	1.69578
441	0.764065	82	1.76304	441	0.934188	78	1.69199
444	0.758095	81	1.77404	443	0.930209	77	1.70814
447	0.733223	80	1.76557	446	0.931204	76	1.68955
451	0.716311	79	1.76723	449	0.909316
454	0.703377	79	1.76179	453	0.868527
456	0.693428	78	1.77296	455	0.855593
457	0.686464			458	0.84067
457	0.689449			459	0.825747
456	0.693428			459	0.839675
455	0.697408			458	0.846639
454	0.707357			457	0.853603
454	0.699398			456	0.868527
455	0.693428			456	0.868527
457	0.689449			457	0.870516
460	0.669551			459	0.851614
464	0.649654			462	0.819778
468	0.621797			466	0.785952
470	0.606874			469	0.760085
472	0.595931			472	0.743172
473	0.584987			474	0.7183
472	0.584987			475	0.7183
471	0.594936			475	0.727254
470	0.598915			474	0.72228
469	0.59792			473	0.730239
469	0.598915			472	0.745162
471	0.586977			472	0.738198
474	0.564095			473	0.740188
477	0.527284			475	0.727254
481	0.510371			479	0.691439
485	0.490474			483	0.648659
487	0.471571			486	0.622792
488	0.454658			489	0.596925
488	0.448689			490	0.579018
488	0.453663			491	0.585982
486	0.462617			490	0.592946
485	0.470576			489	0.586977
484	0.466597			488	0.607869
485	0.456648			487	0.606874
488	0.434761			488	0.59991
491	0.413868			489	0.592946
495	0.373078			492	0.548177
499	0.354176			496	0.509376
502	0.323335			500	0.48351
504	0.315376			503	0.468586
504	0.308411			505	0.453663
503	0.313386			506	0.453663
502	0.328309			506	0.455653
500	0.334278			505	0.473561
500	0.32035			503	0.468586
500	0.332289			502	0.47953
502	0.32035			502	0.466597
505	0.289509			504	0.460627
509	0.262647			507	0.433766
513	0.231806			510	0.407899
517	0.221857			515	0.387007
519	0.20395			518	0.355171
519	0.20196			521	0.342237
519	0.212903			522	0.327314
517	0.217878			522	0.326319
516	0.225837			521	0.349201
515	0.227827			519	0.348207
515	0.222852			518	0.351191
516	0.215888			517	0.365119
520	0.194001			518	0.347212
524	0.181067			521	0.333283
528	0.158185			525	0.310401
532	0.143262			529	0.267622
534	0.139283			533	0.265632
535	0.143262			536	0.241755
534	0.147242			537	0.250709
532	0.162165			537	0.249714
530	0.158185			536	0.251704
529	0.158185			534	0.266627
529	0.160175			532	0.267622
531	0.145252			532	0.272596
535	0.128339			533	0.268616
539	0.119385			536	0.233796
544	0.0913296			540	0.209919
547	0.0783962			544	0.187037
549	0.0662587			548	0.167139
550	0.0832711			551	0.150226
549	0.0910311			552	0.142267
547	0.101477			552	0.145252
545	0.11839			550	0.158185
544	0.12038			549	0.162165
544	0.108441			547	0.191016
546	0.0921255			547	0.179078
551	0.0735213			548	0.164155
555	0.0625777			551	0.148236
560	0.0490474			555	0.114411
563	0.0452668			560	0.0948117
564	0.0476545			564	0.0818783
564	0.0323335			566	0.0657613
563	0.051833			567	0.0598915
560	0.0531264			566	0.0551161
559	0.0633736			565	0.0686464
558	0.0462617			563	0.0730239
559	0.0529274			561	0.0750136
562	0.0390986			561	0.0676516
567	0.0319355			563	0.0663582
572	0.0200965			567	0.0530269
576	0.0117395			571	0.0497438
578	0.00972988			576	0.0480525
579	0.0162165			579	0.0273591
578	0.0105457			581	0.0478535
576	0.0149231			581	0.0400935
573	0.0145252			580	0.0460627
572	0.0252698			578	0.0448689
572	0.0202955			576	0.039994
575	0.007183			575	0.0492464
579	0.0160175			576	0.0396955
584	0.00911306			579	0.0417848
589	0.0138288			583	0.0265632
592	0.0329304			588	0.0192011
593	0.0136298			592	0.0167139
592	-0.0134308			595	0.0166144
591	-0.0109436			596	0.019997
588	-0.0100482			595	0.0181067
586	0.0123365			593	0.0134308
586	0.0206934			591	0.0165149
588	-0.0190021			589	0.0213898
592	0.0047754			589	0.0287519
597	0.00420832			592	0.0255683
602	0.0130329			596	0.024076
605	-0.00110431			601	0.0209919
607	0.0129334			605	0.0155201
607	0.015918			609	0.0189026
605	0.0103467			610	-0.00746157
602	0.00535243			610	0.015719
600	-0.00936178			608	0.0121375
599	-0.00753121			605	0.0117395
601	-0.0100482			603	0.012237
605	0.0148236			603	0.00290504
610	0.0160175			605	0.011839
616	0.012038			609	0.0149231
619	0.00721285			614	0.0107447
621	-0.0255683			619	0.00173108
621	0.0132318			622	0.00643685
619	-0.0217878			624	0.0142267
616	0.00310401			624	0.0143262
614	0.027956			622	0.0103467
613	0.0217878			619	0.0068348
615	0.00919265			617	0.015719

## Sheet: G48940
Wils, K., et al., 2021, Earthquake doublet revealed by multiple pulses in lacustrine seismo-turbidites: Geology, v. 49, https://doi.org/10.1130/G48940.1
